# Supplementary material for: Fine Co nanoparticles encapsulated in N-doped porous carbon for efficient oxygen reduction
Source: Royal Society of Chemistry journal article supplement (doi:10.1039/c9nj00050j), 2019-01-01
Supplement: c9nj00050j1.pdf [file c9nj00050j1.pdf]

## Supporting Information

### **Fine Co Nanoparticles Encapsulated in N-Doped Porous Carbon for Efficient Oxygen Reduction**

Lei Liu, Yihe Zhang\*, Xuelian Yu\*\*

National Laboratory of Mineral Materials, Beijing Key Laboratory of Materials Utilization of  
Nonmetallic Minerals and Solid Wastes, School of Materials Science and Technology, China University  
of Geosciences, Beijing, 10083, China.

#### **Corresponding Authors E-mail addresses:**

\*\*Xuelian Yu: [xlyu@cugb.edu.cn](mailto:xlyu@cugb.edu.cn)

\*Yihe Zhang: [zyh@cugb.edu.cn](mailto:zyh@cugb.edu.cn)

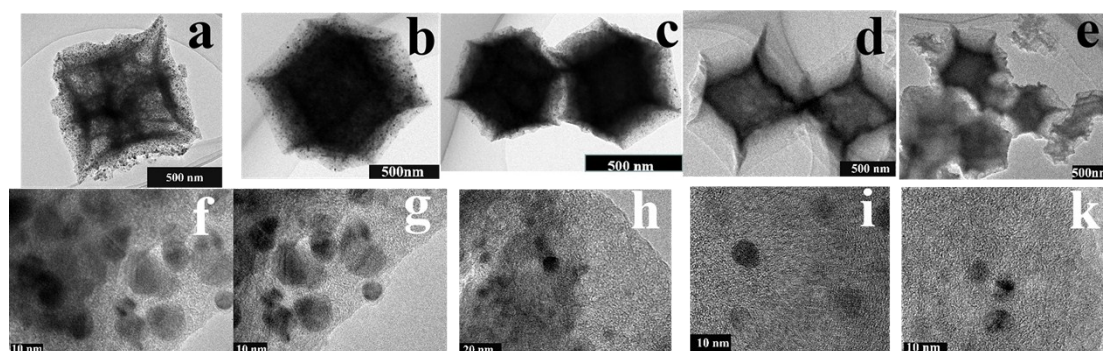

**Fig.S1.** The TEM and HRTEM of Co@NPC(**a,f**), Co@NPC-APt(t=4h)(**b,g**), Co@NPC-APt(t=8h)(**c,h**), Co@NPC-APt(t=12h)(**d,i**) and Co@NPC-APt(t=16h)(**e,k**)

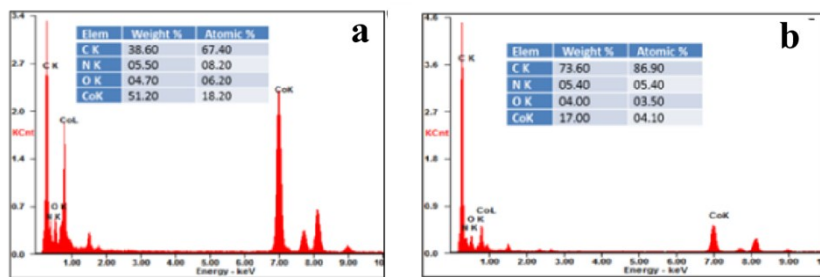

**Fig.S2.** EDS of Co@NPC(a) and Co@NPC-Apt(t=12h)(b)

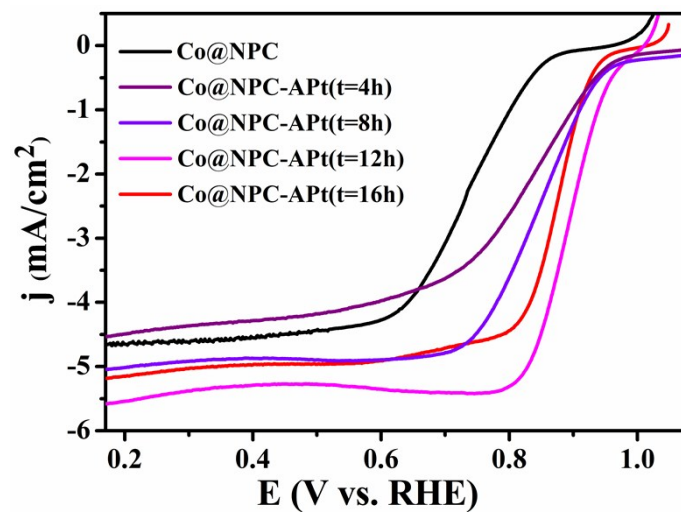

Fig.S3. LSV curves of Co@NPC-APt(t=0,4h,8h,12h,16h) under 1600rpm.

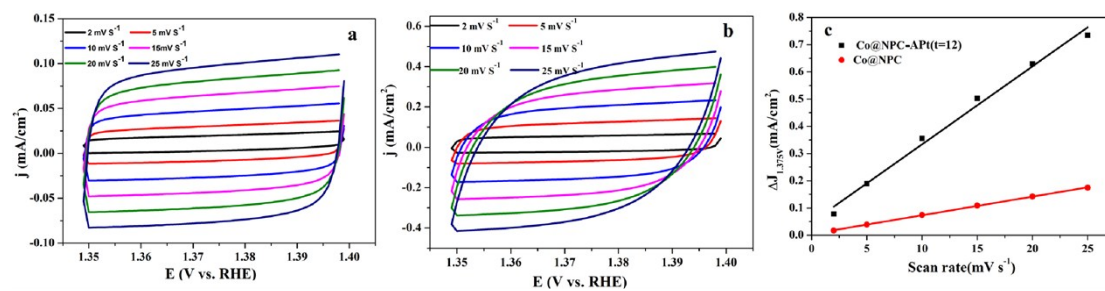

**Fig.S4.** CVs of the Co@NPC (a) and Co@NPC-APt(t=12) (b) (Potential from 1.35 V to 1.40 V) measured in 0.1 M KOH at scan rates of 2-25 mV s<sup>-1</sup>. (c) Plots of the  $\Delta J$  ( $\Delta J=J_a-J_c$ ,  $J_a$  is the anodic current density and  $J_c$  is the cathodic current density) at 1.375 V vs. the scan rate to determine the double layer capacitance ( $C_{dl}$ )

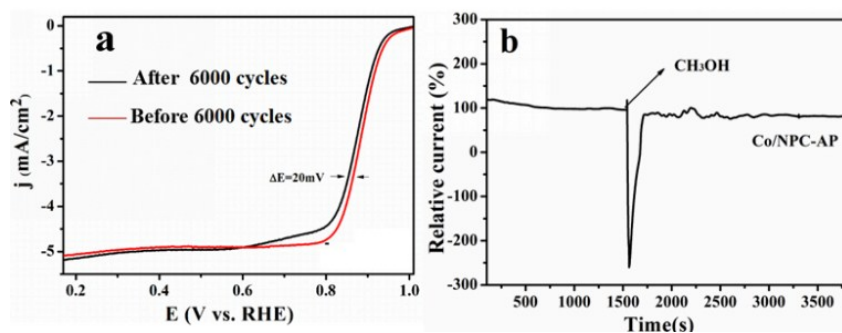

**Fig.S5** The durability (a) and methanol-tolerance evaluation (b) of Co@NPC-APt(t=12) catalysts by the chronoamperometric responses.

**Table 1.** Comparison of electrocatalytic performance of Co@NPC-APt(t=12) with various catalysts reported in the literature.

| Samples                                    | E <sub>onset</sub> (V vs. RHE) | E <sub>1/2</sub> (V vs. RHE) | J <sub>d</sub>  (mA·cm <sup>-2</sup> ) | Electrolyte | references |
|--------------------------------------------|--------------------------------|------------------------------|----------------------------------------|-------------|------------|
| Co <sub>3</sub> O <sub>4</sub> /N-C/MWCNTs | 0.89                           | ~0.81                        | 4.5                                    | 0.1 M KOH   | S1         |
| Co@C-800                                   | 0.92                           | 0.82                         | 4.9                                    | 0.1 M KOH   | S2         |
| Co@Pt-NC                                   | 0.99                           | 0.87                         | 5.9                                    | 0.1 M KOH   | S3         |
| Co@Co <sub>3</sub> O <sub>4</sub> -NC      | 0.91                           | 0.74                         | 4.5                                    | 0.1 M KOH   | S4         |
| LDHs@Co,Zn-ZIF                             | 0.97                           | 0.84                         | 5.8                                    | 0.1 M KOH   | S5         |
| Co-NC@CoP-NC                               | 0.89                           | 0.78                         | 4.8                                    | 0.1 M KOH   | S6         |
| N, Co-CNSs-800                             | 0.96                           | 0.83                         | 4.7                                    | 0.1 M KOH   | S7         |
| Carbon-L                                   | 0.86                           | 0.70                         | 4.6                                    | 0.1 M KOH   | S8         |
| Co@NPC-AP                                  | 0.95                           | 0.89                         | 5.6                                    | 0.1 M KOH   | This work  |

**Reference:**

- S1.** X. Li, Y. Fang, X. Lin, M. Tian, X. An, Y. Fu, R. Li, J. Jin and J. Ma, *J. Mater. Chem. A*, 2015, 3, 17392-17402.
- S2.** G. C. Li, J. Li, Z. W. Zhou, C. L. Li, C. Cai, B. K. Guo, R. D. Priestley, L. Han and R. Liu, *Dalton Trans.*, 2017,46, 16419-16425;
- S3.** L. Wang, Z. Tang, W. Yan, Q. Wang, H. Yang and S. Chen, *J. Power Sources*, 2017, 343, 458-466.
- S4.** A. Aijaz, J. Masa, C. Rösler, W. Xia, P. Weide, A. J. Botz, R. A. Fischer, W. Schuhmann and M. Muhler, *Angew. Chem. Int. Ed.*, 2016, 55, 4087-4091.
- S5.** Z. Li, M. Shao, L. Zhou, Q. Yang, C. Zhang, M. Wei, D. G. Evans and X. Duan, *Nano Energy*, 2016, 25, 100-109.
- S6.** X. Li, Q. Jiang, S. Dou, L. Deng, J. Huo, S. Wang, X. Li, Q. Jiang, S. Dou and L. Deng, *J. Mater. Chem. A*, 2016, 4, 15836-15840.
- S7.** Y. N. Hou, Z. Zhao, Z. Yu, Y. Tang, X. Wang and J. Qiu, *Chem. Commun.*, 2017, 53, 7840-7843.
- S8.** P. Zhang, F. Sun, Z. Xiang, Z. Shen, J. Yun and D. Cao, *Energy Environ. Sci.*, 2013, 7, 442-450;
